# Differential Calcium Signaling by Cone Specific Guanylate Cyclase-Activating Proteins from the Zebrafish Retina

Alexander Scholten<sup>1</sup>, Karl-Wilhelm Koch<sup>1,2,3\*</sup>

**1** Institute of Biology and Environmental Science, Carl von Ossietzky University Oldenburg, Oldenburg, Germany, **2** Research Center Neurosensory Science, Carl von Ossietzky University Oldenburg, Oldenburg, Germany, **3** Center of Interface Science, Carl von Ossietzky University Oldenburg, Oldenburg, Germany

## Abstract

Zebrafish express in their retina a higher number of guanylate cyclase-activating proteins (zGCAPs) than mammals pointing to more complex guanylate cyclase signaling systems. All six zGCAP isoforms show distinct and partial overlapping expression profiles in rods and cones. We determined critical  $\text{Ca}^{2+}$ -dependent parameters of their functional properties using purified zGCAPs after heterologous expression in *E.coli*. Isoforms 1–4 were strong, 5 and 7 were weak activators of membrane bound guanylate cyclase. They further displayed different  $\text{Ca}^{2+}$ -sensitivities of guanylate cyclase activation, which is half maximal either at a free  $\text{Ca}^{2+}$  around 30 nM (zGCAP1, 2 and 3) or around 400 nM (zGCAP4, 5 and 7). Zebrafish GCAP isoforms showed also differences in their  $\text{Ca}^{2+}/\text{Mg}^{2+}$ -dependent conformational changes and in the  $\text{Ca}^{2+}$ -dependent monomer-dimer equilibrium. Direct  $\text{Ca}^{2+}$ -binding revealed that all zGCAPs bound at least three  $\text{Ca}^{2+}$ . The corresponding apparent affinity constants reflect binding of  $\text{Ca}^{2+}$  with high ( $\leq 100$  nM), medium (0.1–5  $\mu\text{M}$ ) and/or low ( $\geq 5$   $\mu\text{M}$ ) affinity, but were unique for each zGCAP isoform. Our data indicate a  $\text{Ca}^{2+}$ -sensor system in zebrafish rod and cone cells supporting a  $\text{Ca}^{2+}$ -relay model of differential zGCAP operation in these cells.

**Citation:** Scholten A, Koch K-W (2011) Differential Calcium Signaling by Cone Specific Guanylate Cyclase-Activating Proteins from the Zebrafish Retina. PLoS ONE 6(8): e23117. doi:10.1371/journal.pone.0023117

**Editor:** Steven Barnes, Dalhousie University Canada

**Received:** May 21, 2011; **Accepted:** July 10, 2011; **Published:** August 2, 2011

**Copyright:** © 2011 Scholten and Koch. This is an open-access article distributed under the terms of the Creative Commons Attribution License, which permits unrestricted use, distribution, and reproduction in any medium, provided the original author and source are credited.

**Funding:** This work was supported by grants from the Deutsche Forschungsgemeinschaft to K-WK (KO 948/7-1, KO948/7-2). The funders had no role in study design, data collection and analysis, decision to publish, or preparation of the manuscript.

**Competing Interests:** The authors have declared that no competing interests exist.

\* E-mail: karl.w.koch@uni-oldenburg.de

## Introduction

Neuronal calcium sensor proteins regulate different neuronal functions by interactions with specific targets [1,2]. They can be classified in five subgroups having members in yeast, nematodes, insects, fishes and mammals. Two subgroups, the recoverins and the guanylate cyclase-activating proteins (GCAPs), are primarily expressed in rod and cone photoreceptor cells of the vertebrate retina, where they control enzyme activities of rhodopsin kinase and guanylate cyclases by sensing changes of intracellular  $\text{Ca}^{2+}$  during illumination. Light causes a drop of intracellular  $\text{Ca}^{2+}$ , which triggers activation of membrane bound guanylate cyclases (GC) in rod and cone cells. This effect is mediated by GCAPs and has mainly been studied with the mammalian isoforms GCAP1 and GCAP2 [3–6].

A larger variety (six to eight) of GCAP isoforms was found in pufferfish (*Fugu rubripes*) [7], carp (*Cyprinus carpio*) [8] and zebrafish (*Danio rerio*) [7–9] and mRNA transcripts have been localized in photoreceptor cells of the adult fish retina, whereby the four isoforms zGCAP3, 4, 5 and 7 exhibit a cone specific expression pattern. In situ hybridization studies showed that zGCAP3 and zGCAP5 are dominantly present in all four cone cell types, red- and green-sensitive double cones, blue-sensitive long single cones and UV-sensitive short single cones [[10], (Rätscho, N., Scholten, A. and Koch, K.-W., unpublished observation)]. Transcription of zGCAP4 was most intense in double cones and long single cones, significantly less in short single cones, whereas transcripts of

zGCAP7 were weakly stained in all cone cell types [7]. A different transcription pattern was observed for zGCAP1 and 2 showing expression in rods and short single cones [[7,11], (Rätscho, N., Scholten, A. and Koch, K.-W., unpublished observation)]. A recent study on zebrafish larvae further showed that zGCAP3, zGCAP4 and zGCAP7 were expressed already 3–4 days post fertilization (dpf) and the expression onset overlapped with the temporal transcription start of three membrane bound sensory guanylate cyclases zGC1–3 [9].

An initial biochemical characterization of zGCAP3 and zGCAP4 revealed that both proteins undergo  $\text{Ca}^{2+}$ -induced conformational changes and thereby activate membrane bound guanylate cyclases at low  $[\text{Ca}^{2+}]$  [10,11]. A recent study that combined biochemical and electrophysiological methods explored the GCAP/GC-mediated cGMP synthesis in rod and cones from the carp retina showing a 5–10 times higher cGMP synthesis rate in cones than in rods [8].

Unresolved issues of cone phototransduction include the molecular details enabling cones to operate over a much larger light intensity range than rods and the nonsaturating behaviour of the cone light response [12].

In mammalian photoreceptors regulation of light sensitivity is to a significant part mediated by changes in cytoplasmic  $[\text{Ca}^{2+}]$  [13] and includes also translocation processes of signaling proteins [14].  $\text{Ca}^{2+}$ -sensor proteins in rod and cone cells detect changes in cytoplasmic  $[\text{Ca}^{2+}]$  and regulate their target proteins in a  $\text{Ca}^{2+}$ -

dependent manner [1–6]. The seemingly redundant expression of GCAP isoforms in vertebrate rod and cone cells has led to several biochemical and physiological studies that demonstrated distinct roles of GCAP1 and GCAP2. A characteristic feature of the GCAP1-GCAP2-tandem is their difference in  $\text{Ca}^{2+}$ -sensitive regulation of GCs [15–17], which apparently is the molecular basis of their different effects in shaping the light response of photoreceptor cells [18–21]. These findings collectively support a “ $\text{Ca}^{2+}$ -relay model” of GCAP action, where a fall in intracellular  $[\text{Ca}^{2+}]$  triggers the sequential activation of GCAP1 and GCAP2 [22,23].

The large variety of zGCAP isoforms in zebrafish cone cells raises the question, whether cone specific isoforms of zGCAPs differ in their  $\text{Ca}^{2+}$ -sensitive properties enabling also a step by step activation of guanylate cyclases in a sequential order. We addressed this question by investigating the  $\text{Ca}^{2+}$ -sensitive properties of all zGCAPs in a comparative study.

## Materials and Methods

### Cloning and site-directed mutagenesis

The cloning of zGCAP4 has been described elsewhere [11]. The coding sequences of zGCAP1, 2, 3, 5 and 7 were amplified from a zebrafish retinal cDNA library (number 760, Deutsches Ressourcenzentrum für Genomforschung GmbH, Berlin; used for zGCAP3 and 5) or from cDNA first strand preparations of adult retina (zGCAP1, 2 and 7) by polymerase chain reaction employing the following primers 5'-AAACATATGGGCAATTCACGGG-CAGC-3' and 5'-AACGAATTCCTTAAACGCTGTGTCTCCG-GTTATG-3' (zGCAP1), 5'-TTCCATATGGGTCAGCGGCT-CAGCG-3' and 5'-GTGGAATTCAAAAGTTGGCGCTGCG-GC-3' (zGCAP2), 5'-GGACATATGGGCGCCACGCAT-3' and 5'-GTTCCCGTCCACGAATTCACTCCTTC-3' (zGCAP3), 5'-CTCCATATGGGGACTCCTCCAGCAT-3' and 5'-AGT-GAATTCATGCTTGATCCTCGATGATC-3' (zGCAP5), 5'-AAACATATGGGCGCAAGATCAAAGCGATG-3' and 5'-AAA-GAATTCATGTTTCTTCCCAAGTTGT-3' (zGCAP7). For heterologous expression in *E.coli* the amplified PCR product was ligated into a pET-expression vector using *NdeI* and *EcoRI* restriction sites. Plasmid preparation, restriction analysis and transformation were done according to standard protocols. Sequences of all zGCAP forms were verified by DNA sequencing.

### Heterologous expression and purification of zGCAP forms

Large amounts of non-myristoylated zGCAPs were obtained by overexpression in BL21 *E.coli* cells. Expression was started at an  $\text{OD}_{600}$  of 0.6 by induction with IPTG and bacteria were grown for 4 hours at 37°C. Bacteria were harvested by centrifugation and stored until use at  $-80^\circ\text{C}$ . After thawing and cell lysis zGCAP forms were isolated from the soluble cell fraction (zGCAP3 and 4) or from inclusion bodies (zGCAP1, 2, 5 and 7). Purification was a combination of anion exchange chromatography on a HiLoad 26/10 Q sepharose-column and of size exclusion chromatography on a HiLoad 26/60 Superdex 75-column (both from Amersham). The columns were equilibrated in 20 mM Tris-HCl pH 7.5, 1 mM DTT and NaCl in different concentrations. Before the samples were applied to size exclusion chromatography proteins were precipitated by ammonium sulfate to reduce volume. Prior to chromatography steps insoluble proteins from inclusion bodies were completely denatured using 6 M guanidine hydrochloride and refolded during dialysis against chromatography buffer (20 mM Tris-HCl, pH 7.5, 150 mM NaCl, 1 mM DTT) including one buffer change.

### Guanylate cyclase assay

Guanylate cyclase activity in bovine rod outer segment (ROS) membranes originates mainly (ca. 96%) from ROS-GC1 and to a lesser extent (4%) from ROS-GC2 [24]. We used washed bovine ROS membranes that were stripped of endogenous GCAPs to measure GC activities after reconstitution with purified zGCAPs according to a detailed protocol that was published before [25] with the following modifications: for the determination of  $\text{EC}_{50}$ -values the zGCAP concentration was varied between 0.25 and 10  $\mu\text{M}$ .  $\text{Ca}^{2+}$ -dependent GC activities were obtained by keeping zGCAP concentrations fixed at 10  $\mu\text{M}$  and varying the free  $[\text{Ca}^{2+}]$  using a  $\text{K}_2\text{H}_2\text{EGTA}/\text{CaH}_2\text{EGTA}$  buffer system as described previously [11,24]. The free  $\text{Mg}^{2+}$ -concentration was 1 mM. All incubation steps were performed under very dim red light, the reactions were stopped and further processed for analysis as described.

### Limited proteolysis

GCAP samples were treated with trypsin similarly to [26]. We used a ratio of 300:1 (GCAP: trypsin) in a volume of 50  $\mu\text{l}$  and added either  $\text{CaCl}_2$  or EGTA to a final concentration of 1 mM. The reaction was stopped after 2, 5 or 10 minutes by boiling and further analyzed by sodium dodecylsulfate (SDS) polyacrylamide gel electrophoresis.

### High performance liquid chromatography

Purified protein samples (20  $\mu\text{g}$ ) were analyzed for the presence of monomeric and/or dimeric zGCAP forms by employing size exclusion chromatography on a BioSep-SEC S2000 column (Phenomenex, Aschaffenburg, Germany) including molecular mass standards as described [26].

### Tryptophan (Trp) fluorescence spectroscopy

Intrinsic Trp fluorescence measurements were performed with a spectrometer from photon Technology International (pTI) essentially as described before [25,26]. Data recording and analysis was done with the pTI software package FELIX32. Lyophilized samples of zGCAPs were dissolved in bidistilled water containing 1 mM DTT at a concentration of 70–120  $\mu\text{M}$ . Shortly before recording the spectrum the protein stock was diluted in fluorescence buffer (80 mM Hepes pH 7.5, 40 mM KCl, 1 mM  $\text{MgCl}_2$ , 1 mM DTT) at a final concentration of 0.7–1.2  $\mu\text{M}$ . The excitation wavelength was set to 280 nm, the emission spectrum was recorded from 300–420 nm. Different free  $[\text{Ca}^{2+}]$  were adjusted by a set of  $\text{Ca}^{2+}/\text{EGTA}$  buffer solution (see above).

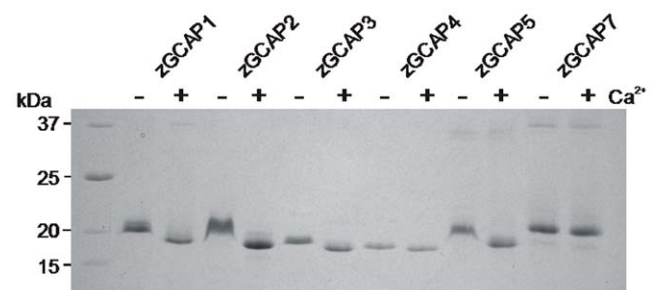

**Figure 1. Electrophoretic analysis of purified zGCAPs.** Two  $\mu\text{g}$  of purified nonmyristoylated zGCAPs were applied on a SDS polyacrylamide gel (15% acrylamide) in the absence (–, 1 mM EGTA) and presence (+, 1 mM  $\text{CaCl}_2$ ) of  $\text{Ca}^{2+}$ . EGTA-samples also contained 1 mM  $\text{MgCl}_2$ . After electrophoresis the gel was stained with Coomassie Blue. doi:10.1371/journal.pone.0023117.g001

**Table 1.** Comparison of biochemical properties of bovine (b) and zebrafish (z) GCAPs.

| properties                                                               | bGCAP1 <sup>1</sup> | bGCAP2 <sup>2</sup> | zGCAP1   | zGCAP2   | zGCAP3   | zGCAP4   | zGCAP5    | zGCAP7    |
|--------------------------------------------------------------------------|---------------------|---------------------|----------|----------|----------|----------|-----------|-----------|
| "Ca <sup>2+</sup> -shift" (ÅkDa)                                         | 4–5                 | 4–5                 | 2        | 3        | <1       | 1        | 2         | <1        |
| Ca <sup>2+</sup> -bound state more stable against proteolysis by trypsin | +                   | +                   | +        | +        | +        | +        | +         | +         |
| change in Trp fluorescence <1 μM [Ca <sup>2+</sup> ] <sub>f</sub>        | drop                | drop                | increase | increase | increase | increase | no change | increase  |
| change in Trp fluorescence >1 μM [Ca <sup>2+</sup> ] <sub>f</sub>        | increase            | no change           | increase | increase | increase | increase | increase  | no change |
| effect of Mg <sup>2+</sup> on Trp fluorescence                           | +                   | +                   | –        | –        | –        | –        | –         | +         |
| Ca <sup>2+</sup> -dependent changes in monomer/dimer-ratio               | –                   | +                   | +        | –        | –        | –        | –         | +         |

<sup>1</sup>and<sup>2</sup>data taken from references 3, 16, 26, 32 and 34.

doi:10.1371/journal.pone.0023117.t001

### Determination of Ca<sup>2+</sup>-binding constants

Ca<sup>2+</sup>-binding to zGCAPs was monitored using a previously described chelator assay [27–29]. The method is based on the competition for Ca<sup>2+</sup> between the protein and a chromophoric chelator whose absorbance changes upon Ca<sup>2+</sup> binding. Similar amounts (10–50 μM) of the chelator 5,5'-Br<sub>2</sub>-BAPTA and protein are titrated with Ca<sup>2+</sup> and the binding of the cation to the chelator is monitored by UV absorbance at 263 nm. Data were fitted by employing a Newton-Raphson direct least-square fitting procedure implemented in the CaLigand software [27]. Details of the titration procedure and evaluation of the data obtained with zGCAPs was performed as described recently for mammalian GCAP1 mutants [30]. In addition, after obtaining the macroscopic binding constants (K<sub>i</sub>, i=1,2,...etc.) for each binding site as described [30], these values were used to assess the degree of saturation for each zGCAP variant as a function of free [Ca<sup>2+</sup>], hence yielding the apparent affinity constants. For the fitting the precise concentration of each protein sample stock was determined by amino acid analysis after acid hydrolysis (Biomedical Center, Uppsala, Sweden).

### Other methods

Standard biochemical techniques as SDS polyacrylamide gel electrophoresis and determination of protein content were done according to well established protocols in our laboratory [5,15,16,24–26]. For protein determination of purified zGCAP samples we measured light extinction at 280 nm using isoform specific extinction coefficients evaluated in our laboratory. Heterologous expression, purification and use of bovine GCAP1

and GCAP2 (bGCAP) samples were exactly as previously described [15,16,24–26].

## Results

### Heterologous expression and purification of zGCAPs

All six zebrafish specific GCAP forms could be purified from bacterial lysates using anion exchange chromatography, ammonium sulfate precipitation and size exclusion chromatography. Although all isoforms could be purified from soluble cell fractions higher yields were obtained by purifying and renaturing zGCAP1, 2, 5 and 7 from inclusion bodies. In control experiments no differences were observed between proteins from soluble fractions or from inclusion bodies. All Ca<sup>2+</sup>-loaded zGCAPs have an apparent molecular mass of 19–21 kDa as analysed by SDS polyacrylamide gel electrophoresis and the electrophoretic mobility became less in the absence of Ca<sup>2+</sup> by adding EGTA. Interestingly, this Ca<sup>2+</sup>-shift differed among the tested zGCAPs as it was most prominent for zGCAP2 and zGCAP5 (Figure 1 and Table 1). Furthermore, we observed that adding Mg<sup>2+</sup> to the sample buffer containing EGTA enhanced the Ca<sup>2+</sup>-shift in particular for zGCAP2 and zGCAP5 (as shown in Figure 1), which points to the Mg<sup>2+</sup>-binding properties of GCAPs as described previously for mammalian GCAPs [17]. We used non-myristoylated zGCAPs in the present study for the following reasons: (a) not all zGCAPs contain an ideal consensus site for myristoylation and so far it is unknown, whether zGCAPs expressed in zebrafish retina are myristoylated or not; (b) when coexpressed with a myristoyltransferase in *E.coli*, we were not able to confirm myristoylation for all zGCAPs, not even after creating

**Table 2.** GC activating properties of GCAPs obtained with washed bovine ROS membranes.

| properties                                                     | bGCAP1              | bGCAP2              | zGCAP1 | zGCAP2  | zGCAP3 | zGCAP4               | zGCAP5   | zGCAP7 |
|----------------------------------------------------------------|---------------------|---------------------|--------|---------|--------|----------------------|----------|--------|
| EC <sub>50</sub> -value (μM GCAP)                              | 0.9 <sup>1</sup>    | 0.2 <sup>1</sup>    | 3.0    | 0.2     | 0.7    | 0.7 <sup>3</sup>     | n.d.     | 1.2    |
| IC <sub>50</sub> -value (nM [Ca <sup>2+</sup> ] <sub>f</sub> ) | 1,100 <sup>2</sup>  | 215 <sup>2</sup>    | 30     | 35      | 25     | 520 <sup>3</sup>     | 440      | 180    |
| x-fold activation <sup>4</sup>                                 | 3-fold <sup>2</sup> | 9-fold <sup>2</sup> | 3-fold | 10-fold | 6-fold | 13-fold <sup>3</sup> | 1.5-fold | 2-fold |

<sup>1</sup>data taken from ref. 31.<sup>2</sup>data taken from ref. 16.<sup>3</sup>data taken from ref. 11.<sup>4</sup>x-fold activation is expressed as GC<sub>max</sub>–GC<sub>min</sub>/GC<sub>min</sub>; GC<sub>max</sub>: GC activity at maximum; GC<sub>min</sub>: GC activity at minimum.

doi:10.1371/journal.pone.0023117.t002

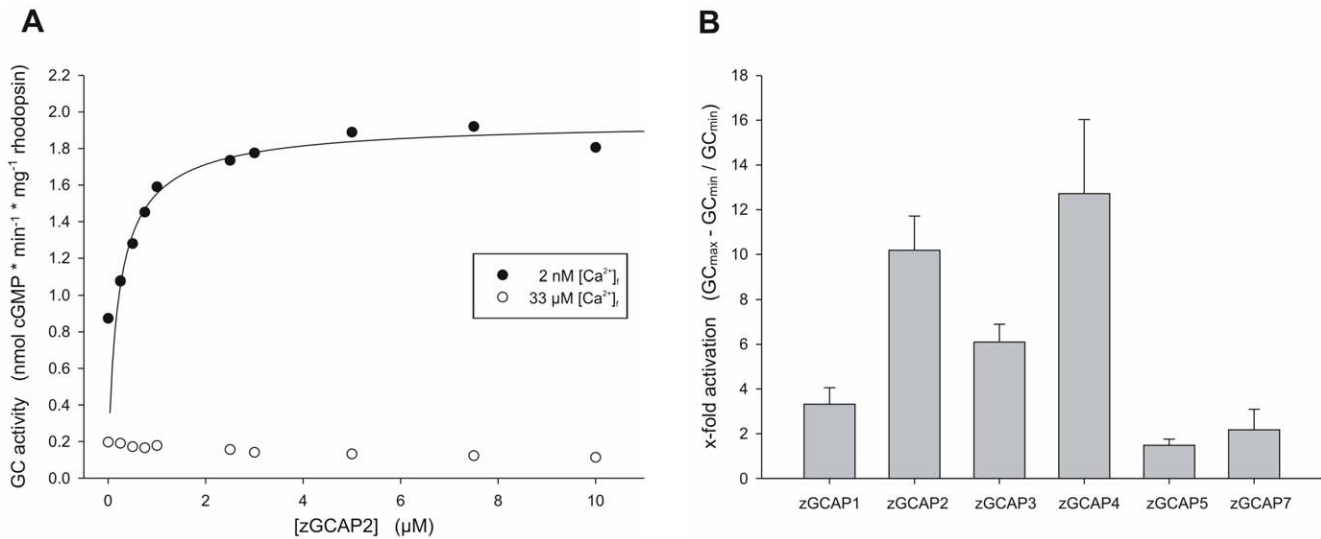

**Figure 2. Guanylate cyclase activation by zGCAPs.** Purified samples of zGCAPs were incubated with washed ROS membranes from bovine rod outer segments. The prominent GC in these membranes is ROS-GC1 (GC-E) [24]. A. In order to determine  $EC_{50}$  values bovine ROS-GC1 in native membranes was reconstituted with increasing concentrations of zGCAPs at low free  $[\text{Ca}^{2+}]_i$  of 2 nM. A representative plot is shown for zGCAP2 with data obtained at low (black circles) and high (33  $\mu\text{M}$ )  $[\text{Ca}^{2+}]_i$  (open circles). B. GC activities were measured after reconstitution with 10  $\mu\text{M}$  of each zGCAP isoform at high and low free  $[\text{Ca}^{2+}]_i$ , 33  $\mu\text{M}$  and 2 nM, respectively. Activities are expressed in x-fold activation for each zGCAP ( $GC_{\text{max}} - GC_{\text{min}}$  divided by  $GC_{\text{min}}$ ). Data are the mean of 3–5 sets  $\pm$  s.d. doi:10.1371/journal.pone.0023117.g002

a consensus site for myristoylation by site-directed mutagenesis (unpublished observation). So far, only for zGCAP4 we were able to investigate the myristoylated and non-myristoylated forms of the protein in more detail and found no significant differences in key properties of its  $\text{Ca}^{2+}$ -sensor function [11]. However, we cannot exclude that some zGCAP isoforms exhibit different properties, when expressed as myristoylated variants in zebrafish cones.

#### Activation of membrane bound guanylate cyclase by zGCAPs

Regulatory properties of zGCAPs were tested using washed bovine ROS membranes as a source for GCs. Tests were run in different ways leading to three parameters: the  $EC_{50}$  value gives the particular zGCAP concentration that half-maximally activates GCs, the  $IC_{50}$  value gives the  $[\text{Ca}^{2+}]_i$  at which the GC activity is halfmaximal and the x-fold activation is expressed as

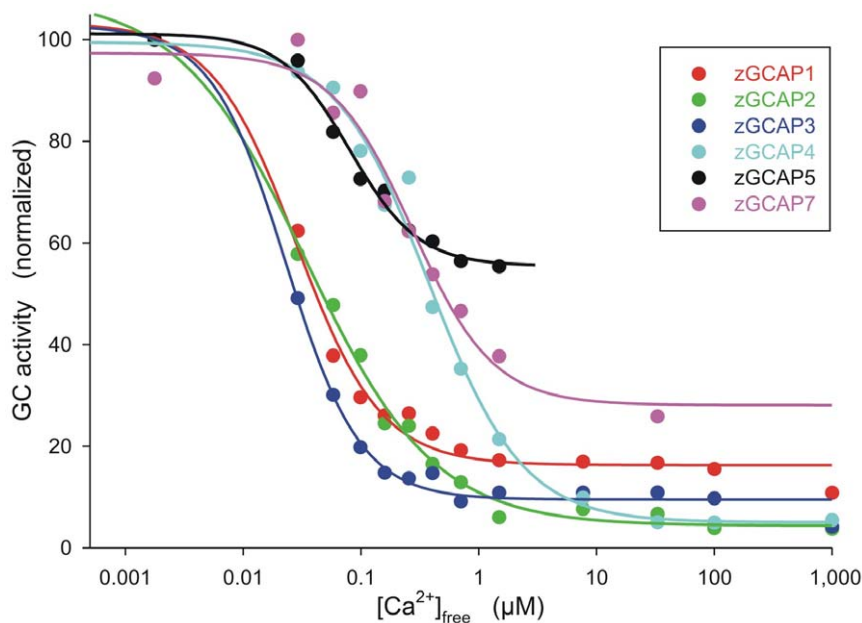

**Figure 3.  $\text{Ca}^{2+}$ -sensitive regulation of GC activity by zGCAPs.**  $\text{Ca}^{2+}$ -dependent activation profile of native bovine ROS-GC1 by different zGCAP isoforms (10  $\mu\text{M}$ ); free  $[\text{Ca}^{2+}]_i$  was adjusted by a  $\text{Ca}^{2+}$ /EGTA buffer system and the maximal activation was normalized to 100%. The  $IC_{50}$  value of each zGCAP is listed in Table 2. Data are representative of at least three independent replicates. doi:10.1371/journal.pone.0023117.g003

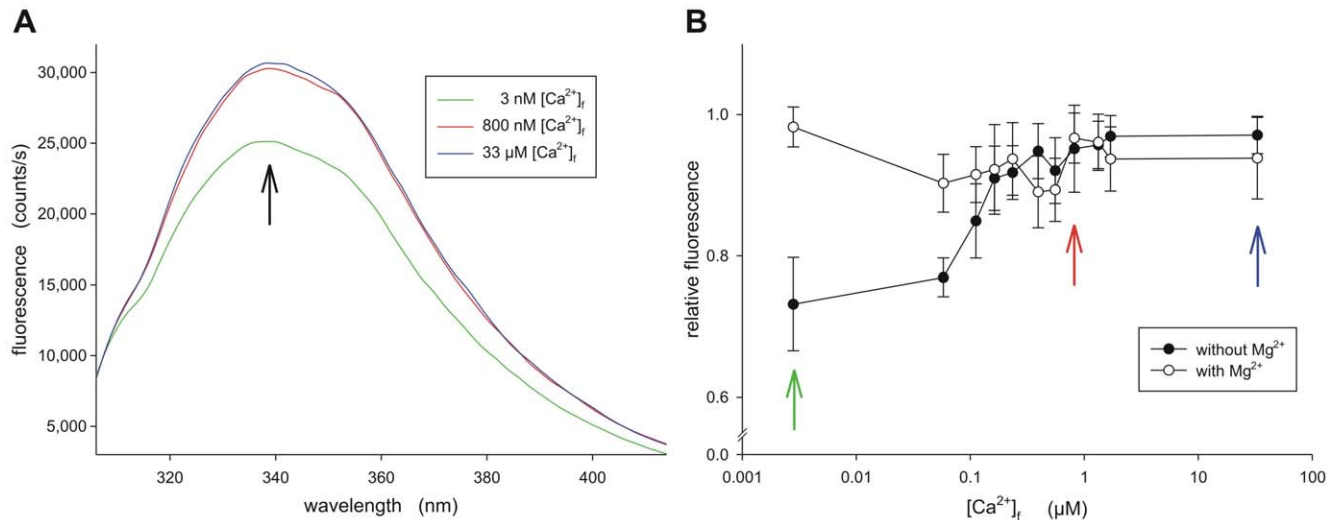

**Figure 4. Trp fluorescence emission of zGCAP7.** A. Exemplary fluorescence emission scans of zGCAP7 at three different free  $[Ca^{2+}]_i$ , 3 nM, 800 nM and 33  $\mu$ M. No  $Mg^{2+}$  was present. B. The relative fluorescence at 336 nm of zGCAP7 (approx. 1  $\mu$ M) was measured at different free  $[Ca^{2+}]_i$  in the presence and absence of 1 mM  $Mg^{2+}$  as indicated. Coloured arrows indicate the data of corresponding scans in panel A. Values were normalized to the highest obtained value (see black arrow in panel A) of each data set. Each data point is the mean of four separate determinations  $\pm$  s.d. doi:10.1371/journal.pone.0023117.g004

$GC_{max} - GC_{min}$  divided by  $GC_{min}$  (Table 2).  $EC_{50}$  values of zGCAPs were in the range between 0.2 and 3  $\mu$ M (Table 2 and Figure 2A for a representative example) and were comparable to the  $EC_{50}$  of bovine GCAP1 and GCAP2, 0.9 and 0.2  $\mu$ M, respectively [31]. Significant differences however were observed in the  $IC_{50}$  values and the x-fold activation (Table 2). The strongest activators were zGCAP2 and zGCAP4 with 10- to 13-fold activation (Figure 2B). Less strong, but similar to the bovine ortholog was zGCAP1. A slightly stronger activator was zGCAP3, but rather weak activation of two-fold or less was observed with zGCAP7 and zGCAP5.

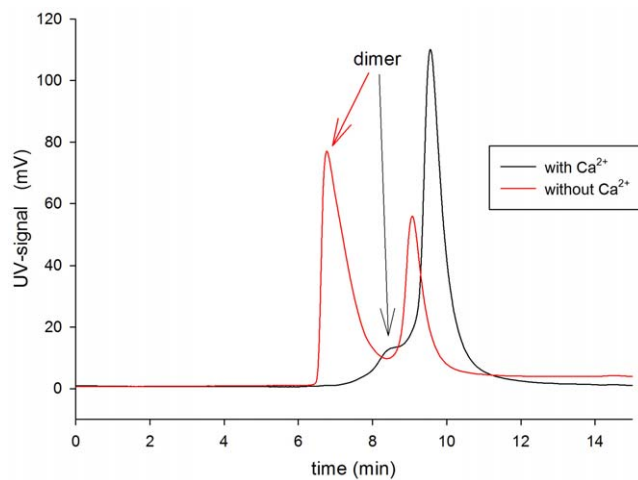

**Figure 5. Analytical size exclusion chromatography of zGCAP7.** Samples of zGCAP7 were loaded on a BioSep-SEC S2000 column and the monomer-dimer equilibrium was analyzed by performing the runs either in the presence of 0.5 mM  $CaCl_2$  or 0.5 mM EGTA (red trace). Elution of proteins was detected at 280 nm (monitored as a mV-signal). Elution of a zGCAP7 dimer is indicated by an arrow. doi:10.1371/journal.pone.0023117.g005

### $Ca^{2+}$ -sensitive regulation of membrane bound guanylate cyclase by zGCAPs

A characteristic feature of mammalian GCAPs is their  $Ca^{2+}$ -sensitive regulation of membrane bound GC activity. The  $IC_{50}$  values of zGCAPs could be separated in two groups; one group consisting of zGCAP1, 2, and 3 had  $IC_{50}$  values around 30 nM free  $[Ca^{2+}]_i$ , the second group of zGCAP4, 5 and 7 had  $IC_{50}$  values between 180 and 520 nM centered around 400 nM (Table 2 and Figure 3). Taking into account the different expression profiles of zGCAPs [9,10], every cone cell type seems to express at least one pair of zGCAPs with different  $Ca^{2+}$ -sensitivities (see also Discussion below).

### $Ca^{2+}$ -induced conformational changes in zGCAPs

$Ca^{2+}$ -induced conformational changes of GCAPs are thought to trigger their biological function [3–6,11]. We performed a series of tests to investigate, how zGCAPs undergo  $Ca^{2+}$ -dependent conformational changes. First, zGCAPs exhibited a  $Ca^{2+}$ -dependent electrophoretic mobility shift as shown in Figure 1. Second, limited proteolysis with trypsin allows detecting differences in protease accessibility, when  $Ca^{2+}$  is present or absent [25,32]. All  $Ca^{2+}$ -bound zGCAPs were more stable against proteolysis than their  $Ca^{2+}$ -free counterparts (Table 1). These results indicated that changing  $[Ca^{2+}]_i$  lead to a change in protein conformation in all zGCAPs.

Third,  $Ca^{2+}$ -induced conformational changes in mammalian GCAP1 and GCAP2 can be monitored by intrinsic Trp fluorescence allowing the determination of the free  $[Ca^{2+}]_i$  that triggers the change [3,26,33,34]. We recorded fluorescence emission between 300 and 420 nm for all zGCAPs. Representative fluorescence emission scans of zGCAP7 are shown in Figure 4A. The relative fluorescence intensity was at low free  $[Ca^{2+}]_i$  (2–3 nM) for nearly all zGCAPs at a minimum. It constantly changed to higher intensity values at increasing  $[Ca^{2+}]_i$  (Table 1). An exception was observed with zGCAP5 that showed no change in fluorescence intensity below 1  $\mu$ M  $[Ca^{2+}]_i$  and with zGCAP7 that showed no change above 1  $\mu$ M  $[Ca^{2+}]_i$  (Table 1). For comparison we included data from the literature that were obtained with

bovine GCAP1 and 2. In this aspect zGCAP7 was similar to bovine GCAP2, whereas zGCAP5 was unique. Changes in Trp fluorescence below 1  $\mu\text{M}$  indicated that zGCAPs undergo conformational changes in a physiologically relevant range of the free  $[\text{Ca}^{2+}]$ , which is consistent with the  $\text{IC}_{50}$  values reported above.

Recent work by Peshenko and Dizhoor [34,35] has demonstrated that GCAPs can bind  $\text{Mg}^{2+}$  in exchange for  $\text{Ca}^{2+}$ , when  $[\text{Ca}^{2+}]$  is

kept low. By this action  $\text{Mg}^{2+}$  can affect the intrinsic Trp fluorescence. For instance, it abolishes the  $\text{Ca}^{2+}$ -dependent changes in fluorescence intensity denoted as phase I [17]. This effect was prominently visible with bovine GCAP1 and GCAP2 as previously reported, but we did not see it with zGCAPs. Only the Trp fluorescence of zGCAP7 was sensitive to  $\text{Mg}^{2+}$ , which is shown in Figure 4. Below 1  $\mu\text{M}$  free  $[\text{Ca}^{2+}]$  the relative Trp fluorescence emission of zGCAP7 is lower without than with  $\text{Mg}^{2+}$ .

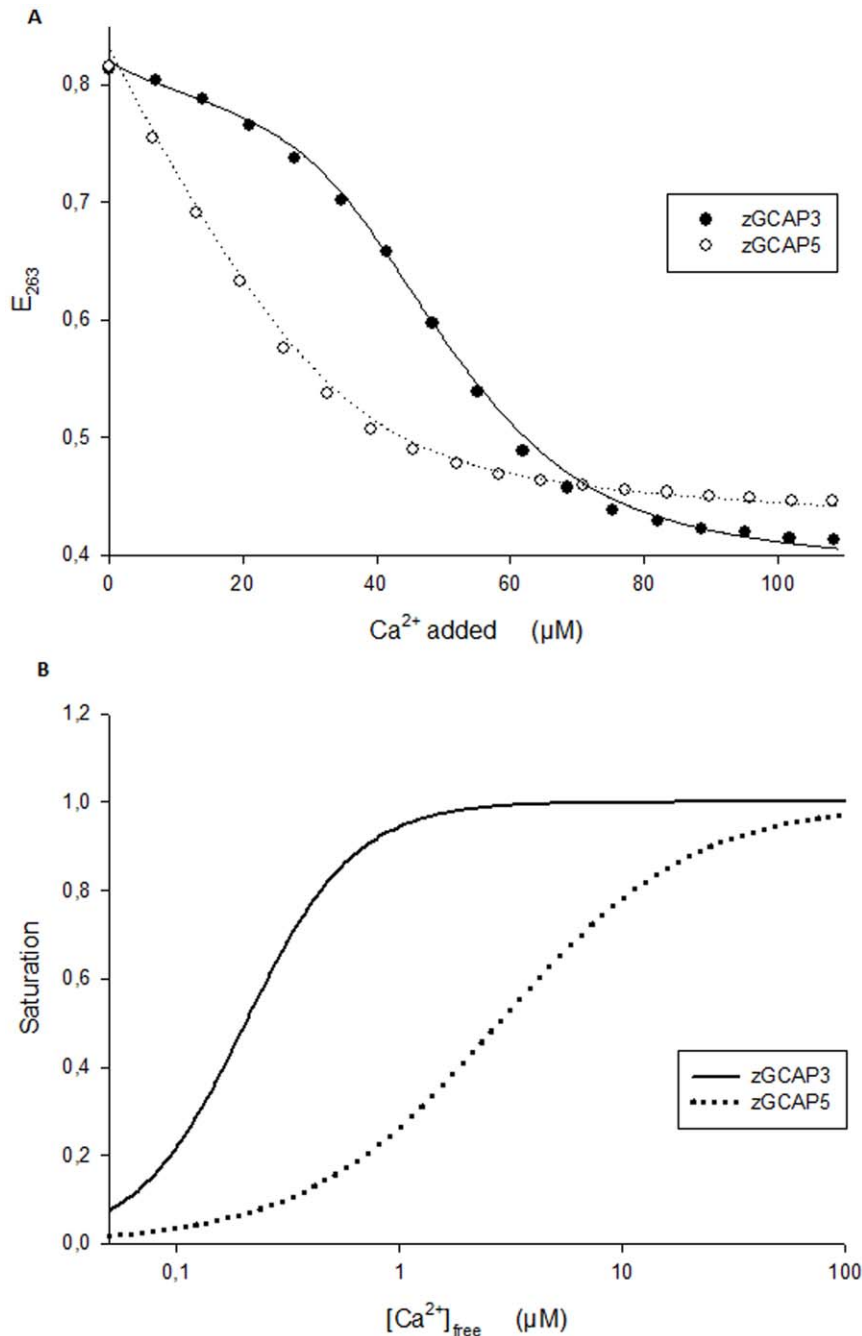

**Figure 6.  $\text{Ca}^{2+}$ -binding to zGCAPs.** A.  $\text{Ca}^{2+}$ -titration curves for zGCAP3 and zGCAP5. Experimental points obtained by the chelator assay are shown as indicated and were fitted as described previously [27–30]. Protein concentration was 14.4  $\mu\text{M}$  for zGCAP3 and 11.7  $\mu\text{M}$  for zGCAP5. B.  $\text{Ca}^{2+}$  saturation curves of zGCAP3 and zGCAP5 corresponding to the titrations shown in A. Determination of the point of halfmaximal saturation yielded the apparent  $K_D$  values listed in Table 4. doi:10.1371/journal.pone.0023117.g006

**Table 3.** Summary of results from the chelator assay determining  $\text{Ca}^{2+}$ -binding affinities including macroscopic binding constants.

| Isoform | logk1                  | logk2                  | logk3                  | logk4     |
|---------|------------------------|------------------------|------------------------|-----------|
| zGCAP1  | 7.15±0.18              | 1.37±0.60              | 5.77±1.39              |           |
| zGCAP2  | 5.33±0.11              | 6.02±0.12              | 4.31±0.25              |           |
| zGCAP3  | 6.06±0.29              | 7.25±0.14              | 5.52±0.23              |           |
| zGCAP4  | see below <sup>1</sup> | see below <sup>1</sup> | see below <sup>1</sup> |           |
| zGCAP5  | 5.42±0.12              | 1.49±0.75              | 6.53±0.49              |           |
| zGCAP7  | 6.41±2.13              | 6.44±0.27              | 7.75±1.12              | 6.24±1.77 |

<sup>1</sup>Macroscopic binding constants were measured from a total set of 14 determinations and exhibited large scattering in the following ranges: logk1 = ≥8; logk2 = 5–7; logk3 = 2–6.

doi:10.1371/journal.pone.0023117.t003

### $\text{Ca}^{2+}$ -dependent monomer-dimer formation of zGCAPs

Changing  $[\text{Ca}^{2+}]$  influences the monomer-dimer equilibrium of bovine GCAP1 and GCAP2 in different ways [26,36]. We therefore analyzed the monomer-dimer equilibrium of zGCAPs by size exclusion chromatography showing that only zGCAP1 and zGCAP7 dimerize in a  $\text{Ca}^{2+}$ -dependent manner similar as it was observed with bovine GCAP2 (Table 1). An exemplary size exclusion chromatography of zGCAP7 is presented in Figure 5 showing the elution of  $\text{Ca}^{2+}$ -bound zGCAP7 at 9.5 min corresponding to a zGCAP7 monomer. The small shoulder at 8.5 min resulted probably from a minor fraction of dimeric zGCAP7. Complexing  $\text{Ca}^{2+}$  by addition of EGTA led to a chromatographic resolution of two peaks with retention times at 6.8 min and 9 min, which would correspond to dimeric and monomeric zGCAP7, respectively. The slight shift in retention times of monomer and dimer forms, when the  $[\text{Ca}^{2+}]$  was changed (for example from 9.5 to 9 min) mirrors the  $\text{Ca}^{2+}$ -induced conformational change in zGCAP7 leading to a different hydrodynamic volume of the protein. Other zGCAP forms did not undergo a monomer-dimer equilibrium shift; instead they remained to a large extent in a monomeric state as this was seen with zGCAP7 in the presence of  $\text{Ca}^{2+}$  (Figure 5, black trace). Only zGCAP1 formed to some extent dimers (about 18%).

### $\text{Ca}^{2+}$ -binding of zGCAPs

Direct binding of  $\text{Ca}^{2+}$  to zGCAPs was tested by the chelator assay measuring the competition of zGCAPs and the chromophoric chelator 5,5'-Br<sub>2</sub>-BAPTA for  $\text{Ca}^{2+}$  [27–29]. Two examples of titration curves obtained with zGCAP3 and zGCAP5 are shown in Figure 6A yielding apparent macroscopic affinity constants by computer fitting [27] that are listed in Table 3. The  $\text{Ca}^{2+}$ -titration curves could be best fitted by a model assuming three  $\text{Ca}^{2+}$ -binding sites, except for zGCAP7 for which four  $\text{Ca}^{2+}$ -binding sites gave the best fit result. All zGCAPs except zGCAP5 and zGCAP2 displayed one high affinity site with an apparent affinity constant  $K^{\text{H}} \leq 100$  nM. At least one constant of medium affinity ( $K^{\text{M}} = 0.1$ – $5$   $\mu\text{M}$ ) was obtained for all zGCAPs and one low affinity site was measured with zGCAP1, zGCAP2 and zGCAP5 ( $K^{\text{L}} \geq 5$   $\mu\text{M}$ ). A particular case was observed with zGCAP7 that contained one high affinity and three medium affinity sites (Table 3). The results obtained with zGCAP4 allowed only giving a range of macroscopic binding constants that broadly fit into the categories mentioned above (see footnote to Table 3). Transforming the data of the chelator titration assay into  $\text{Ca}^{2+}$ -saturation curves (Figure 6B) allowed us to determine a macroscopic affinity

**Table 4.** Summary of macroscopic apparent  $K_{\text{D}}$  values obtained from  $\text{Ca}^{2+}$ -saturation curves.

| Isoform | $K_{\text{D}}$ [ $\mu\text{M}$ ] |
|---------|----------------------------------|
| zGCAP1  | 0.07±0.03                        |
| zGCAP2  | 1.67±0.13                        |
| zGCAP3  | 0.19±0.05                        |
| zGCAP4  | n.d.                             |
| zGCAP5  | 3.87±1.0                         |
| zGCAP7  | 1.71±0.34                        |

doi:10.1371/journal.pone.0023117.t004

constant as an apparent  $K_{\text{D}}$  for the binding of  $\text{Ca}^{2+}$  to zGCAPs (Table 4). Among different zGCAP isoforms these values span a range from 70 nM to 3.9  $\mu\text{M}$   $\text{Ca}^{2+}$ . Interestingly, the apparent  $\text{Ca}^{2+}$ -affinities did not match with the  $\text{IC}_{50}$  values of GC regulation (compare with Table 3). Instead they were in all cases much lower and the apparent  $K_{\text{D}}$ s differed from the  $\text{IC}_{50}$  value by a factor of 2.3 (zGCAP1) up to a factor of 48 (zGCAP2).

## Discussion

The central conclusion of the present work is that the variety of GCAPs in the zebrafish retina reflects a  $\text{Ca}^{2+}$ -sensor system with different biochemical properties. Most significant are differences in the  $\text{IC}_{50}$  values (Table 2 and Figure 3) that cluster at rather distant free  $[\text{Ca}^{2+}]$  but fit into the physiological range of  $[\text{Ca}^{2+}]$  in a vertebrate photoreceptor cell.

Direct measurements of cytoplasmic  $[\text{Ca}^{2+}]$  in zebrafish cones (and rods) are still missing, but Ciluffo et al. suggested from their measurements on visible cones a mean dark value around 400 nM [37]. They further observed that sufficiently high background light can cause a transient increase of  $[\text{Ca}^{2+}]$  which is followed by the well understood light-triggered decrease of cytoplasmic  $[\text{Ca}^{2+}]$  in photoreceptor cells via the operation of the  $\text{Na}^+/\text{Ca}^{2+}$ ,  $\text{K}^+$ -exchanger. This complex pattern of changes in intracellular  $[\text{Ca}^{2+}]$  had previously been detected in cones from the zebrafish mutant *nof* [38] and, more recently, had been described in UV-sensitive cones [39]. All zGCAPs underwent  $\text{Ca}^{2+}$ -induced conformational changes and regulated membrane bound GC between 30 and 500 nM  $[\text{Ca}^{2+}]$ , but why do cone cells express more than one form of zGCAP?

Our data suggest that the different cone subtypes harbour combinations of zGCAPs that exhibit complementary properties. Figure 7 gives an overview of zGCAP expression and the level of activation that is achieved with the particular isoform. For example, strong transcription signals of zGCAP1, 2, 3 and 5 were observed in UV cones [7,9], but significantly lower transcript levels were observed for zGCAP4 and 7 (Rätscho, N., Scholten, A. and Koch, K.-W., unpublished observation). Thus, UV cones would express one isoform (zGCAP2) with high and two (zGCAP1 and 3) with moderate x-fold activation (Table 2). The  $\text{Ca}^{2+}$ -sensing and GC-activating properties further support this conclusion as the  $\text{IC}_{50}$  values of zGCAP1, 2 and 3 were similar and differed from those of zGCAP4, 5 and 7. The low  $\text{IC}_{50}$  values of UV-cone specific zGCAPs indicate further that the  $\text{Ca}^{2+}$ -feedback on cGMP synthesis in order to operate efficiently would require a larger drop in cytoplasmic  $[\text{Ca}^{2+}]$  than in other cone types, but so far a comparative analysis of changes in cytoplasmic  $[\text{Ca}^{2+}]$  in different cone types is missing.

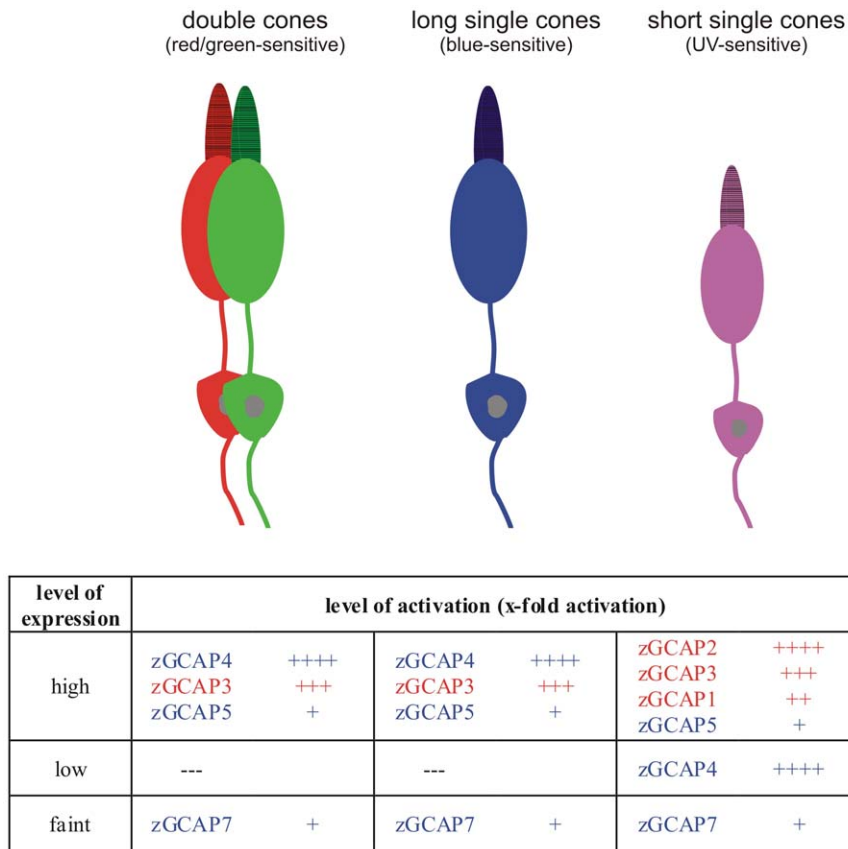

**Figure 7. Schematic summary of zGCAP expression in different cone types.** Double cones (long-wavelength sensitive), long single cones (short-wavelength sensitive) and short single cones (UV-sensitive) are drawn schematically in the upper part. The lower part compares the expression profiles of zGCAPs with their activation profiles. The indicated level of activation (x-fold) corresponds to >10-fold: ++++; 5–10-fold: +++; 3–5-fold: ++; <3-fold: +. Isoforms of zGCAPs regulating GC with a low  $IC_{50}$  value (around 30 nM free  $[Ca^{2+}]$ ) are written in red, isoforms regulating GC with a high  $IC_{50}$  around 400 nM  $[Ca^{2+}]$  are written in blue. Details are described and discussed in the main text. doi:10.1371/journal.pone.0023117.g007

In long single cones and double cones transcription of zGCAP3, zGCAP4 and zGCAP5 [7,9] appears strong, but that of zGCAP7 is weak. Again, we have a similar, but not identical pattern as in UV cones: one strong activator (zGCAP4), one moderate activator (zGCAP3) and one weak activator (zGCAP7) of GC are found in the same cell types. Further, the range of  $[Ca^{2+}]$ , where these zGCAPs dynamically regulate GC, is expanded with  $IC_{50}$  values between 30 and 520 nM.

Measurements of the apparent  $Ca^{2+}$ -affinity of each zGCAP were broadly consistent with the  $Ca^{2+}$ -sensitive regulation of GC, since the apparent binding constants were in the nanomolar to lower micromolar range (Table 4). One peculiar case was observed with zGCAP7, for which we obtained the best fitting result assuming four  $Ca^{2+}$ -binding sites. We can only speculate on the interpretation of this result, since the first EF-hand is considered to be nonfunctional in all zGCAPs including zGCAP7 [7], although this has not experimentally proven and waits further investigation. However, one might argue that the  $Ca^{2+}$ -free zGCAP7 is present as a dimer at the start of the  $Ca^{2+}$ -titration and is shifted to the monomeric form at increasing  $[Ca^{2+}]$ . We cannot exclude that the monomer-dimer equilibrium of zGCAP7 (Table 1 and Figure 5) interferes with the  $Ca^{2+}$ -binding events during the titration, but in case of zGCAP1 that also formed dimers in the presence of EGTA we obtained a satisfying fit with three  $Ca^{2+}$ -binding sites.

However, apparent  $Ca^{2+}$ -affinities do not always match with the corresponding  $IC_{50}$  values. Therefore, it seems that the interaction

of zGCAPs with the target GC changes the affinity of the  $Ca^{2+}$ -sensor (i.e. zGCAP) for  $Ca^{2+}$  leading to a zGCAP/GC complex that has a higher  $Ca^{2+}$ -affinity than the isolated protein. This form of intermolecular tuning of a  $Ca^{2+}$ -sensor by its target has been previously observed with calmodulin and is an effective way to allow one small regulatory protein (calmodulin) to interact with a large variety of proteins in a cell [40–42]. The effect of mutually dependent  $Ca^{2+}$ -affinities can be explained by free-energy coupling [43] meaning that binding of  $Ca^{2+}$  to calmodulin influences its affinity to a target in the same manner as the interaction of calmodulin with a target changes its affinity for  $Ca^{2+}$ . The same behavior has been hypothesized for GCAP1/GC interaction [30], but it has been challenged in a recent study on transgenic mice showing that two different GC isoforms are regulated by the same mammalian GCAP with identical sensitivities [44]. The target dependent modulation of the  $Ca^{2+}$ -sensitivity of zGCAPs might become even more complex, if we consider that the zebrafish retina expresses three sensory GCs, one being cone specific and two being expressed in rods and UV cones [9,38,45]. It awaits further analysis to test the combinations of six zGCAP and three GC forms.

Limited proteolysis in the presence and absence of  $Ca^{2+}$  and Trp fluorescence spectroscopy indicated that all zGCAPs exhibited a  $Ca^{2+}$ -induced conformational change.  $Ca^{2+}$ -dependent conformational changes belong to the key properties of  $Ca^{2+}$ -sensors and are thought to represent the activating trigger step in a



GCAP molecule that activates its associated target GC [3–5,22]. Intrinsic Trp fluorescence monitors movements of amino acid side chains in proteins and was particularly useful for correlating conformational changes in mammalian GCAPs with changing  $[Ca^{2+}]$  [26,32–35]. Of particular interest was the observation that the pattern of Trp emission of most zGCAPs (not zGCAP7) did not change by the presence of  $Mg^{2+}$ , which clearly differs from the observation made with bovine GCAP isoforms [34,35]. For example, bovine GCAP1 relative fluorescence emission changes below  $1 \mu M$   $[Ca^{2+}]$  (designated as phase I) correlate with amino acid side chain movements around Trp 21 and 51 and changes above  $1 \mu M$   $[Ca^{2+}]$  (designated as phase II) with movements around Trp 94 [35]. All zGCAPs (with the exception of zGCAP7, see below) harbour a Trp around position 21, but they lack a Trp at position 51 that was shown to be sensitive to  $Mg^{2+}$  in bovine GCAP1 [34,35]. These facts provide an explanation why we did not observe a  $Mg^{2+}$ -dependent intensity change in Trp fluorescence for zGCAP1,2,3,4 and 5, although we observed in the gel shift assay that  $Mg^{2+}$  has an influence on the electrophoretic mobility indicating binding of  $Mg^{2+}$  to zGCAPs. Among all zGCAPs, zGCAP7 has a unique distribution of Trps in the amino acid sequence, present at positions 94, 164 and 178. Although a Trp is missing at position 51, we observed for zGCAP7 a  $Mg^{2+}$ -effect below  $1 \mu M$  free  $[Ca^{2+}]$  (Table 1 and Figure 4). Therefore, we conclude that position 164 and/or 178 might compensate for lacking Trp in position 51 and is/are involved in changes of Trp fluorescence emission below  $1 \mu M$  free  $[Ca^{2+}]$ .

In summary, our data indicate the existence of a complex interplay between  $Ca^{2+}$  and zGCAPs, of which each zGCAP form

displayed a very specific detection mode for  $Ca^{2+}$ . In photoreceptor cells cytoplasmic  $[Ca^{2+}]$  is expected to be balanced at levels that finally depend on the illumination conditions [46]. The six different zGCAPs could operate in cones according to the  $Ca^{2+}$ -relay model previously hypothesized for the function of GCAP1 and GCAP2 in bovine rods [22]. The  $Ca^{2+}$ -fluctuations in a cone cell are therefore adjusted by the  $Ca^{2+}$ -homeostasis that is under control of the illumination conditions. Each range of cytoplasmic  $[Ca^{2+}]$  would be optimal for a specific zGCAP to operate as an activator of GC. The differential fingerprint properties of zGCAPs fit into a step by step regulation of GC activity triggered by changing  $[Ca^{2+}]$ . This zGCAP signaling system might be part of the molecular toolbox enabling the cones to respond to a large range of light intensities. The specific challenges of the zebrafish habitat, for instance, the dominance of short wavelengths in ambient background light, probably caused genome duplication under evolutionary pressure, which is now mirrored in the diversity of zGCAP expression (for an extensive discussion on this point see [47]).

## Acknowledgments

We thank Dr. Daniele Dell'Orco for assistance with the chelator assay and for commenting on the manuscript.

## Author Contributions

Conceived and designed the experiments: AS K-WK. Performed the experiments: AS. Analyzed the data: AS K-WK. Contributed reagents/materials/analysis tools: AS K-WK. Wrote the paper: AS K-WK.

## References

- Burgoyne RD, Weiss JL (2001) The neuronal calcium sensor family of  $Ca^{2+}$ -binding proteins. *Biochem J* 353: 1–12.
- Philippov PP, Koch KW, eds. *Neuronal Calcium Sensor Proteins* Nova Publishers, Hauppauge, NY.
- Palczewski K, Subbaraya I, Gorczyca WA, Helekar BS, Ruiz CC, et al. (1994) Molecular cloning and characterization of retinal photoreceptor guanylyl cyclase-activating protein. *Neuron* 13: 395–404.
- Dizhoor AM, Olshevskaya EV, Henzel WJ, Wong S, Stults J, et al. (1995) Cloning, sequencing, and expression of a 24-kDa  $Ca^{2+}$ -binding protein activating photoreceptor guanylyl cyclase. *J Biol Chem* 270: 25200–25206.
- Frins S, Bönigk W, Müller F, Kellner R, Koch KW (1996) Functional characterization of a guanylyl cyclase-activating protein from vertebrate rods. *J Biol Chem* 271: 8022–8027.
- Haeseleer F, Sokal I, Li N, Pettenati M, Rao N, et al. (1999) Molecular characterization of a third member of the guanylyl cyclase-activating protein subfamily. *J Biol Chem* 274: 6526–6535.
- Imanishi Y, Yang L, Sokal I, Filippek S, Palczewski K, et al. (2004) Diversity of guanylate cyclase-activating proteins (GCAPs) in teleost fish: characterization of three novel GCAPs (GCAP4, GCAP5, GCAP7) from zebrafish (*Danio rerio*) and prediction of eight GCAPs (GCAP1–8) in pufferfish (*Fugu rubripes*). *J Mol Evol* 59: 2204–2217.
- Takemoto N, Tachibanaki S, Kawamura S (2009) High cGMP synthetic activity in carp cones. *Proc Natl Acad Sci USA* 106: 11788–11793.
- Rätscho N, Scholten A, Koch KW (2009) Expression profiles of three novel sensory guanylate cyclases and guanylate cyclase-activating proteins in the zebrafish retina. *Biochim Biophys Acta* 1793: 1110–1114.
- Imanishi Y, Li N, Sokal I, Sowa M, Lichtarge O, et al. (2002) Characterization of retinal guanylate cyclase-activating protein 3 (GCAP3) from zebrafish to man. *Eur J Neurosci* 15: 63–78.
- Behnen P, Scholten A, Rätscho N, Koch KW (2009) The cone-specific calcium sensor guanylate cyclase activating protein 4 from the zebrafish retina. *J Biol Inorg Chem* 14: 89–99.
- Pugh Jr. EN, Lamb TD (2000) Phototransduction in vertebrate rods and cones: molecular mechanisms of amplification, recovery and light adaptation. In: Stavenga DG, DeGrip WJ, Pugh Jr. EN, eds. *Handbook of Biological Physics* Vol.3 Elsevier Science BV 3: 183–255.
- Fain GL, Matthews HR, Cornwall CM, Koutalos Y (2001) Adaptation in vertebrate photoreceptors. *Physiol Rev* 81: 117–151.
- Lobanova ES, Herrmann R, Finkelstein S, Reidel B, Skiba NP, et al. (2010) Mechanistic basis for the failure of cone transducin to translocate: why cones are never blinded by light. *J Neurosci* 30: 6815–6824.
- Hwang JY, Lange C, Helten A, Höppner-Heitmann D, Duda T, et al. (2003) Regulatory modes of rod outer segment membrane guanylate cyclase differ in catalytic efficiency and  $Ca^{2+}$ -sensitivity. *Eur J Biochem* 270: 3814–3821.
- Hwang JY, Koch KW (2002) Calcium- and myristoyl-dependent properties of guanylate cyclase-activating protein-1 and protein-2. *Biochemistry* 41: 13021–13028.
- Peshenko IV, Dizhoor AM (2004) Guanylyl cyclase-activating proteins (GCAPs) are  $Ca^{2+}/Mg^{2+}$  sensors. *J Biol Chem* 279: 16903–16906.
- Mendez A, Burns ME, Sokal I, Dizhoor AM, Bachr W, et al. (2001) Role of guanylate cyclase-activating proteins (GCAPs) in setting the flash sensitivity of rod photoreceptors. *Proc Natl Acad Sci USA* 98: 9948–9953.
- Howes KA, Pennesi ME, Sokal I, Church-Kopish J, Schmidt B, et al. (2002) GCAP1 rescues rod photoreceptor response in GCAP1/GCAP2 knockout mice. *EMBO J* 21: 1545–1554.
- Burns ME, Mendez A, Chen J, Baylor DA (2002) Dynamics of cyclic GMP synthesis in retinal rods. *Neuron* 36: 81–91.
- Makino CL, Peshenko I, Wen XH, Olshevskaya EV, Barrett R, et al. (2008) A role of GCAP2 in regulating the photoresponse. *J Biol Chem* 283: 29135–29143.
- Koch KW (2006) GCAPs, the classical neuronal calcium sensors in the retina; a  $Ca^{2+}$ -relay model of guanylate cyclase activation. *Calcium Binding Proteins* 1: 3–6.
- Burgoyne RD (2007) Neuronal calcium sensor proteins: generating diversity in neuronal  $Ca^{2+}$  signaling. *Nat Rev Neurosci* 8: 182–193.
- Helten A, Säftel W, Koch KW (2007) Expression level and activity profile of membrane bound guanylate cyclase type 2 in rod outer segments. *J Neurochem* 103: 1439–1446.
- Koch KW, Helten A (2008) Guanylate cyclase-based signaling in photoreceptors and retina. Chapter 6 in *Signal Transduction in the Retina* Fliesler SJ, Kisselev OG, eds. Taylor and Francis CRC Press. pp 121–143.
- Hwang JY, Schlesinger R, Koch KW (2004) Irregular dimerization of guanylate cyclase-activating protein 1 mutants causes loss of target activation. *Eur J Biochem* 271: 3785–3793.
- Andre I, Linse S (2002) Measurement of  $Ca^{2+}$ -binding constants of proteins and presentation of the CaLigand software. *Anal Biochem* 305: 195–205.
- Linse S (2002) Calcium binding to proteins studied via competition with chromophoric chelators. In *Calcium-Binding Protein Protocols: Volume 2: Methods and Techniques* Vogel HJ, ed. 15–24, Humana Press.
- Linse S, Johansson C, Brodin P, Grundstrom T, Drakenberg T, et al. (1991) Electrostatic contribution to the binding of  $Ca^{2+}$  in calbindin D9k. *Biochemistry* 30: 154–62.

30. Dell'Orco D, Behnen P, Linse S, Koch KW (2010) Calcium binding, structural stability and guanylate cyclase activation in GCAP1 variants associated with human cone dystrophy. *Cell Mol Life Sci* 67: 973–984.
31. Hwang JY, Koch KW (2002) The myristoylation of the neuronal  $\text{Ca}^{2+}$ -sensors guanylate cyclase-activating protein 1 and 2. *Biochim Biophys Acta* 1600: 111–117.
32. Rudnicka-Nawrot M, Surgucheva I, Hulmes JD, Haeseleer F, Sokal I, et al. (1998) Changes in biological activity and folding of guanylate cyclase-activating protein 1 as a function of calcium. *Biochemistry* 37: 248–257.
33. Ames JB, Dizhoor AM, Ikura M, Palczewski K, Stryer L (1999) Three-dimensional structure of guanylyl cyclase activating protein-2, a calcium-sensitive modulator of photoreceptor guanylyl cyclases. *J Biol Chem* 274: 19329–19337.
34. Peshenko IV, Dizhoor AM (2006)  $\text{Ca}^{2+}$ - and  $\text{Mg}^{2+}$ -binding properties of GCAP1: evidence that  $\text{Mg}^{2+}$ -bound form is the physiological activator of photoreceptor guanylyl cyclase. *J Biol Chem* 281: 23830–23841.
35. Peshenko IV, Dizhoor AM (2007) Activation and inhibition of photoreceptor guanylyl cyclase by guanylyl cyclase activating protein 1 (GCAP-1). *J Biol Chem* 282: 21645–21652.
36. Olshevskaya EV, Ermilov AN, Dizhoor AM (1999) Dimerization of guanylyl cyclase-activating protein and a mechanism of photoreceptor guanylyl cyclase activation. *J Biol Chem* 274: 25583–25587.
37. Cilluffo MC, Matthews HR, Brockerhoff SE, Fain GL (2004) Light-induced  $\text{Ca}^{2+}$ -release in the visible cones of the zebrafish. *Vis Neurosci* 21: 599–609.
38. Brockerhoff S, Rieke F, Matthews HR, Taylor MR, Kennedy B, et al. (2003) Light stimulates a transducin-independent increase of cytoplasmic  $\text{Ca}^{2+}$  and suppression of current in cones from the zebrafish mutant *nof*. *J Neurosci* 23: 470–480.
39. Leung YT, Fain GL, Matthews HR (2007) Simultaneous measurement of current and calcium in the ultraviolet-sensitive cones of zebrafish. *J Physiol* 579: 15–27.
40. Peersen OB, Madsen TS, Falke JJ (1997) Intermolecular tuning of calmodulin by target peptides and proteins: differential effects on  $\text{Ca}^{2+}$  binding and implications for kinase activation. *Protein Sci* 6: 794–807.
41. Brown SE, Martin SR, Bayley PM (1997) Kinetic control of the disassociation pathway of calmodulin-peptide complexes. *J Biol Chem* 272: 3389–3397.
42. Mirzoeva S, Weigand S, Lukas TJ, Shuvalova L, Anderson WF, et al. (1999) Analysis of the functional coupling between calmodulin's calcium binding and peptide recognition properties. *Biochemistry* 38: 3936–3947.
43. Olwin BB, Storm DR (1985) Calcium binding to complexes of calmodulin and calmodulin binding proteins. *Biochemistry* 24: 8081–8086.
44. Peshenko IV, Olshevskaya EV, Savchenko AB, Karan S, Palczewski K, et al. (2011) Enzymatic properties and regulation of the native isozymes of retinal membrane guanylyl cyclase (RetGC) from mouse photoreceptors. *Biochemistry* 50: 5590–5600.
45. Muto A, Orger MB, Wehmann AM, Smear MC, Kay JN, et al. (2005) Forward genetic analysis of visual behavior in zebrafish. *PLoS Genet* 1(5): e66.
46. Gray-Keller MP, Detwiler PB (1996)  $\text{Ca}^{2+}$  dependence of dark- and light-adapted flash responses in rod photoreceptors. *Neuron* 17: 323–331.
47. Rättscho N, Scholten A, Koch K-W (2010) Diversity of sensory guanylate cyclases in teleost fishes. *Mol Cell Biochem* 334: 207–214.
